# Supplementary material for: Carbon capture from corn stover ethanol production via mature consolidated bioprocessing enables large negative biorefinery GHG emissions and fossil fuel-competitive economics
Source: Royal Society of Chemistry journal article supplement (doi:10.1039/d3se00353a), 2023-01-01
Supplement: d3se00353a1.pdf [file d3se00353a1.pdf]

## Appendix A

### *Carbon Capture from Corn Stover Ethanol Production via Mature CBP Enables Large Negative Biorefinery GHG emissions and Fossil Fuel-Competitive Economics*

Matthew R. Kubis<sup>1,2</sup>, Lee R. Lynd<sup>1,2</sup>

<sup>1</sup>Thayer School of Engineering, Dartmouth College, 14 Engineering Drive, Hanover, NH 03755 USA.

<sup>2</sup>The Center for Bioenergy Innovation, Oak Ridge National Laboratory, Oak Ridge, TN 37831 USA.

\*Correspondence: Lee.R.Lynd@Dartmouth.edu

#### Appendix A.1. Table 1. Survey of Technoeconomic Studies for Cellulosic Ethanol Production

|                     | Study          |     | Published (Project Year) | Feedstock     | Process | Feed Cost (\$/dry metric) | Ethanol (MGY) | MESP (\$) | Notes                                                                     |
|---------------------|----------------|-----|--------------------------|---------------|---------|---------------------------|---------------|-----------|---------------------------------------------------------------------------|
| NREL /TP-580-26157  | Wooley et al.  | (1) | 1999 (1997)              | yellow poplar | DAP     | 27.5                      | 52.2          | 1.44      | Biomass-to-ethanol                                                        |
| NREL /TP-580-28893  | McAloon et al. | (2) | 2000 (1999)              | corn stover   | DAP     | 38.5                      | 25            | 1.50      | Compares corn starch and stover                                           |
| NREL /TP-510-32438  | Aden et al.    | (3) | 2002 (2000)              | corn stover   | DAP     | 33.1                      | 69.3          | 1.07      | Stover-to-ethanol                                                         |
| NREL /TP-6A2-46588  | Kazi et al.    | (4) | 2010 (2007)              | corn stover   | DAP     | 83.0                      | 53.4          | 3.40      | Compares four pretreatments, seven scenarios, and estimates pioneer plant |
| NREL /TP-5100-47764 | Humbird et al. | (5) | 2011 (2007)              | corn stover   | DAP     | 64.5                      | 61.0          | 2.15      | Stover-to-ethanol update                                                  |
|                     | Eggeman and    | (6) | 2005                     | corn stover   | DAP     | 35.0                      | 56.1          | 1.34      | Compares pretreatments                                                    |

|  |                         |      |             |             |       |      |      |             |                                                                                                |
|--|-------------------------|------|-------------|-------------|-------|------|------|-------------|------------------------------------------------------------------------------------------------|
|  | Elander                 |      |             |             |       |      |      |             | and concludes DAP has best performance                                                         |
|  | Sendich et al.          | (7)  | 2008        | corn stover | AFEX  | 40.0 | 53.8 | 1.03 (SSCF) | Varies CBP and SSCF, AFEX parameters                                                           |
|  | Huang et al.            | (8)  | 2009        | corn stover | DAP   | 63.8 | 67.4 | 1.42        | Varies biomass type and throughput                                                             |
|  | Klien-Marcusamer et al. | (9)  | 2010 (2009) | corn stover | DAP   | 70.5 | 30.9 | 4.58        | Wiki-based biorefinery platform                                                                |
|  | Bals et al.             | (10) | 2011 (2008) | corn stover | AFEX  | 50   | 23   | 1.86        | Optimizes AFEX conditions                                                                      |
|  | Meyer et al.            | (11) | 2013 (2007) | corn stover | HW    | 64.5 | 47.4 | 2.51        | Varies yeast processes                                                                         |
|  | Tao et al.              | (12) | 2013 (2007) | corn stover | DAP   | 64.5 | 59.0 | 2.21        | Varies corn stover composition                                                                 |
|  | Chen et al.             | (13) | 2015 (2007) | corn stover | DDR   | 64.5 | 64   | 2.24        | Varies deacetylation and disk refining (DDR) technique                                         |
|  | Yang and Rosentrat er   | (14) | 2015        | corn stover | LMAA  | 36.3 | 50   | 3.86        | Low Moisture Anhydrous Ammonia pretreatment                                                    |
|  | Zhao et al.             | (15) | 2015        | corn stover | DAP   | 59.2 | 60.5 | 2.86        | China specific economic data, compares NREL and Chinese status quo (NREL-CN-1 data shown here) |
|  | Liu and Bao             | (16) | 2017 (2013) | corn stover | DryPB |      | 60.1 | 1.79        | Dry acid pretreatment and several others                                                       |
|  | Lynd et al.             | (17) | 2017 (2014) | corn stover | CBP   | 84.5 | 60.0 | 1.88        | Forecasted C-CBP (reference case for this study)                                               |
|  | Stoklosa et al.         | (18) | 2017 (2012) | corn stover | AFEX  | 60   |      | 2.09        | Centralized v. decentralized corn stover processing depots                                     |
|  | Huang et al.            | (19) | 2018 (2007) | corn stover | DAP   | 58.5 | 38.1 | 2.16        | Modeled to breakeven while coproducing                                                         |

|  |                     |      |             |             |     |      |      |      |                                                                        |
|--|---------------------|------|-------------|-------------|-----|------|------|------|------------------------------------------------------------------------|
|  |                     |      |             |             |     |      |      |      | 1,5-PDO                                                                |
|  | Shen, Tao, and Yang | (20) | 2018 (2014) | corn stover | DAP | 85.0 | 57.2 | 2.83 | Modeled to breakeven while coproducing jet fuel from lignin            |
|  | Yang et al.         | (21) | 2020 (2019) | sorghum     | DAP | 95.0 |      | 3.40 | Concerns RNG and CO <sub>2</sub> capture with onsite solids combustion |
|  | Das et al.          | (22) | 2022 (2018) | corn stover | DAP | 64.5 | 61.4 | 2.47 | Compares Humbird et al., 2011 model (updated to 2018) to Py-ECH        |

DAP = Dilute Acid Pretreatment, AFEX = Ammonia Fiber Expansion, DryPB = Dry Acid Pretreatment, LMAA = Low Moisture Anhydrous Ammonia, CBP = Consolidated Bioprocessing, HW = Hot Water, DDR = Deacetylation and Disk Refining. Py-ECH = pyrolysis with electrocatalytic hydrogenation.

**Appendix A.2. Table 2. Fermentation Conditions and Assumed Conversions**

| <b>Fermentation Conditions and Assumed Conversions</b> |                              |                                                                        |                |
|--------------------------------------------------------|------------------------------|------------------------------------------------------------------------|----------------|
| <b>Parameter</b>                                       |                              | <b>Original</b>                                                        | <b>Revised</b> |
| Temperature (°C)                                       |                              | 55                                                                     |                |
| Initial Solid Loading (wt.%)                           |                              | 19.5% total (59.7% carbohydrates, 23.8% insolubles, 16.5% extractives) |                |
| Residence Time (days)                                  |                              | 6                                                                      |                |
| Corn Steep Liquor (CSL)                                | Loading (wt.%)               | 0.155                                                                  | 0.64           |
| Inorganic Nitrogen Loading                             | Loading (g/L)                | 0.261 (DAP)                                                            | 0.387 (urea)   |
| Carbohydrate Solubilization (%)                        |                              | 88                                                                     |                |
| Solubilized Carbohydrates                              | Total Conversion (%)         | 98.06                                                                  |                |
|                                                        | Conversion to Products (%)   | 85.55                                                                  |                |
|                                                        | Conversion to Cells (%)      | 4.75                                                                   |                |
|                                                        | Conversion to Byproducts (%) | 4.75                                                                   |                |
|                                                        | Losses to Contamination (%)  | 3                                                                      |                |
| Ethanol                                                | Titer (g/L)                  | 50.26                                                                  |                |
|                                                        | Productivity (g/L-day)       | 8.36                                                                   |                |
|                                                        | Annual Production (MGY)      | 60.03                                                                  |                |

**Appendix A.3. Table 3. Gas Turbine Performance Parameters**

| <b>Gas Turbine Conditions and Assumptions</b> |                           |                                                    |                       |                    |
|-----------------------------------------------|---------------------------|----------------------------------------------------|-----------------------|--------------------|
| <b>Parameters</b>                             |                           | <b>References</b>                                  | <b>This Study</b>     |                    |
|                                               |                           |                                                    | <b>Biogas Turbine</b> | <b>RNG Turbine</b> |
| Scenarios                                     |                           | (this study)                                       | II & III              | V                  |
| Ambient Conditions                            | Temperature (°C)          | 15 (23–25)                                         | 25                    |                    |
|                                               | Pressure (bar)            | 1.013 (23–26)                                      | 1.013                 |                    |
| Fuel Conditions                               | Temperature (°C)          | 10 (25)                                            | 28                    |                    |
|                                               | Pressure (bar)            | 30 (25)                                            | 1.2                   | 20                 |
| Inlet                                         | Air Feed Rate (kg/s)      | 635 (25)<br>651 (26)                               | 18.1                  | 17.6               |
|                                               | Fuel Feed Rate (kg/s)     | 14.74 (25)<br>0.38 (24)<br>6.0 (23)                | 0.48                  | 0.46               |
| Compressor                                    | Pressure Ratio            | 15.4 (25)<br>15.6 (24)<br>18 (23)<br>17 .03 (26)   | 15.4                  |                    |
|                                               | Mechanical Efficiency (%) | 99 (25)<br>99.5 (24)                               | 99                    |                    |
|                                               | Isentropic Efficiency (%) | 88 (23,25)<br>85.28 (24)<br>89.5 (26)              | 88                    |                    |
| Combustor                                     | Combustion Efficiency (%) | 99.5 (25)<br>99 (23)<br>99.1 (26)                  | 99.5                  |                    |
| Turbine                                       | Inlet Temperature (°C)    | 1328.0 (25)<br>1286 (24)<br>1232 (23)<br>1480 (26) | 1342                  | 1400               |
|                                               | Exhaust Temperature (°C)  | 615.0 (25)<br>548.5 (24)<br>566 (23)<br>597.4 (26) | 675                   | 698                |
|                                               | Exhaust Gas Rate (kg/s)   | 21.09 (24)<br>70.5 (23)                            | 18.6                  | 18.1               |
|                                               | Isentropic Efficiency (%) | 84.66 (24)<br>87 (23)                              | 90                    |                    |

|             |                            |                                                           |       |       |
|-------------|----------------------------|-----------------------------------------------------------|-------|-------|
|             |                            | 90 (26)                                                   |       |       |
| Generator   | Generator Efficiency (%)   | 98.5 (25)<br>98 (24)                                      | 98.5  |       |
| Performance | Net Power Generation (kWh) | 253,200 (25)<br>6,327 (24)<br>25,060 (23)<br>270,494 (26) | 8,830 | 8,922 |
|             | Thermal Efficiency (%)     | 36.17 (25)<br>33.13 (24)<br>36.0 (23)<br>38.2 (26)        | 37.0  | 38.6  |

**Appendix A.4. Table 4. Biogas Membrane Upgrading Performance Parameters**

| <b>Parameters</b>                                           | <b>Deng &amp; Hägg (27)<br/>[scaled]</b> | <b>This Study</b> |
|-------------------------------------------------------------|------------------------------------------|-------------------|
| Raw Biogas Feed (Nm <sup>3</sup> /h)                        | 1,000 [13,714]                           | 13,714            |
| Feed pressure (bar)                                         | 1.2                                      | 1.2               |
| Feed CO <sub>2</sub> concentration (vol.%)                  | 35                                       | 47.8              |
| Feed T and P at 1st and 2 <sup>nd</sup> stage (°C, bar)     | 25, 20                                   | 28, 20            |
| Permeate T and P at 1st and 2 <sup>nd</sup> stage (°C, bar) | 25, 1                                    | 28, 1             |
| CH <sub>4</sub> purity (vol.%)                              | 98                                       | 98                |
| CH <sub>4</sub> recovery (%)                                | 99.7                                     | 99.7              |
| CO <sub>2</sub> purity (vol.%)                              | 98.1                                     | 99.4              |
| Recycle Ratio                                               | 0.24                                     | 0.23              |
| Compression duty (kWh)                                      | 220 [3,017]                              | 3,043             |
| Compressor Isentropic Efficiency (%)                        | 0.75                                     | 0.88              |
| Upgraded biomethane delivery pressure (bar)                 | 40                                       | 20                |

**Appendix A.5. Table 5. Scenario Results Summary**

| Scenario       |                                                            | Process design parameters |                           |                                     |                                |                        | Additional Inputs |       |             | Exports |        |                 | GHG benefits                                                                 |
|----------------|------------------------------------------------------------|---------------------------|---------------------------|-------------------------------------|--------------------------------|------------------------|-------------------|-------|-------------|---------|--------|-----------------|------------------------------------------------------------------------------|
|                |                                                            | Enhanced heat integration | Biogas surplus to turbine | Fermentation CO <sub>2</sub> to CCS | Biogas membrane upgrade to RNG | RNG surplus to turbine |                   |       |             |         |        |                 |                                                                              |
| Reference case |                                                            | no                        | no                        | no                                  | no                             | no                     | 17,463            | kWh   | electricity | 7,137   | gal/hr | ethanol         | fuel pellets displace fossil fuels                                           |
|                |                                                            |                           |                           |                                     |                                |                        | 3,028             | kg/hr | nutrients   | 32,278  | kg/hr  | fuel pellets    |                                                                              |
|                |                                                            |                           |                           |                                     |                                |                        | 1,351             | kg/hr | natural gas |         |        |                 |                                                                              |
| I              | Enhanced heat integration                                  | yes                       | no                        | no                                  | no                             | no                     | 17,463            | kWh   | electricity | 7,132   | gal/hr | ethanol         | no longer consumes natural gas                                               |
|                |                                                            |                           |                           |                                     |                                |                        | 3,028             | kg/hr | nutrients   | 32,300  | kg/hr  | fuel pellets    |                                                                              |
| II             | Biogas electricity                                         | yes                       | yes                       | no                                  | no                             | no                     | 8,845             | kWh   | electricity | 7,132   | gal/hr | ethanol         | Net electricity demand reduced 49%                                           |
|                |                                                            |                           |                           |                                     |                                |                        | 3,028             | kg/hr | nutrients   | 32,300  | kg/hr  | fuel pellets    |                                                                              |
| III            | Biogas electricity and fermentation CO <sub>2</sub> to CCS | yes                       | yes                       | yes                                 | no                             | no                     | 11,746            | kWh   | electricity | 7,132   | gal/hr | ethanol         | Fermentation CO <sub>2</sub> is now captured                                 |
|                |                                                            |                           |                           |                                     |                                |                        | 3,028             | kg/hr | nutrients   | 32,300  | kg/hr  | fuel pellets    |                                                                              |
|                |                                                            |                           |                           |                                     |                                |                        |                   |       |             | 21,080  | kg/hr  | CO <sub>2</sub> |                                                                              |
| IV             | RNG and high-purity CCS                                    | yes                       | no                        | yes                                 | yes                            | no                     | 11,746            | kWh   | electricity | 7,132   | gal/hr | ethanol         | Biogas CO <sub>2</sub> is now captured<br>RNG surplus displaces fossil fuels |
|                |                                                            |                           |                           |                                     |                                |                        | 3,028             | kg/hr | nutrients   | 32,300  | kg/hr  | fuel pellets    |                                                                              |
|                |                                                            |                           |                           |                                     |                                |                        |                   |       |             | 32,907  | kg/hr  | CO <sub>2</sub> |                                                                              |
| V              | RNG electricity and high-purity CCS                        | yes                       | no                        | yes                                 | yes                            | yes                    | 11,746            | kWh   | electricity | 7,132   | gal/hr | ethanol         | Net electricity demand reduced 7%                                            |
|                |                                                            |                           |                           |                                     |                                |                        | 3,028             | kg/hr | nutrients   | 32,300  | kg/hr  | fuel pellets    |                                                                              |
|                |                                                            |                           |                           |                                     |                                |                        |                   |       |             | 32,907  | kg/hr  | CO <sub>2</sub> |                                                                              |



## Appendix A.6. Calculations for Levelized Cost of CO<sub>2</sub> Capture

### CO<sub>2</sub> (fermentation only)

Equipment Contribution: 1) CO<sub>2</sub> compressor

$$6.68 \text{ MM}\$_{CO_2 \text{ compressor}} \times 0.15_{\text{capital charge factor}} = 1.00 \text{ MM}\$_{\text{annualized capital cost}}$$

Electricity Contribution:

$$2,841 \text{ kWh}_{CO_2 \text{ compressor demand}} \times 0.0681 \frac{\$}{\text{kWh}} = 193.47 \frac{\$}{\text{hour}}$$

$$193.5 \frac{\$}{\text{hour}} \times 8,410 \frac{\text{hours}}{\text{year}} = 1.62 \text{ MM}\$_{\text{annual electric demand}}$$

Sum of Contributions:

$$1.00 \text{ MM}\$_{\text{annualized capital cost}} + 1.62 \text{ MM}\$_{\text{annual electric demand}} = 2.62 \text{ MM}\$_{\text{annualized cost}}$$

Annual CO<sub>2</sub> Production: 177,209 ton/year

$$2.12 \text{ MM}\$_{\text{annualized cost}} \div 177,209 \frac{\text{ton}}{\text{year}} = 14.78 \frac{\$}{\text{ton}} CO_2$$

### CO<sub>2</sub> (fermentation & biogas combined)

Equipment Contribution: 1) CO<sub>2</sub> compressor

$$8.68 \text{ MM}\$_{CO_2 \text{ compressor}} \times 0.15_{\text{capital charge factor}} = 1.30 \text{ MM}\$_{\text{annualized capital cost}}$$

Electricity Contribution:

$$4,364 \text{ kWh}_{CO_2 \text{ compressor demand}} \times 0.0681 \frac{\$}{\text{kWh}} = 297.18 \frac{\$}{\text{hour}}$$

$$297.18 \frac{\$}{\text{hour}} \times 8,410 \frac{\text{hours}}{\text{year}} = 2.50 \text{ MM}\$_{\text{annual electric demand}}$$

Sum of Contributions:

$$1.30 \text{ MM}\$_{\text{annualized capital cost}} + 2.50 \text{ MM}\$_{\text{annual electric demand}} = 3.80 \text{ MM}\$_{\text{annualized cost}}$$

Annual CO<sub>2</sub> Production: 276,659 ton/year

$$3.80 \text{ MM}\$_{\text{annualized cost}} \div 276,659 \frac{\text{ton}}{\text{year}} = 13.74 \frac{\$}{\text{ton}} CO_2$$

## Appendix A.7. Fuel Pellet Production Sensitivity Analysis.

It was observed that increasing or decreasing fuel pellet selling prices has a uniform effect on the MESP related to equal fuel pellet throughput amongst the scenarios. To put it another way, the modifications made to improve the biorefinery GHG balance did not change the MESP's sensitivity towards fuel pellet selling prices. A 20% change (+ or -) in fuel pellet price (baseline \$166/ton) did not change the MESP by 20% which is consistent with fuel pellet revenue making up less than half of total revenue in Figure 3.B.

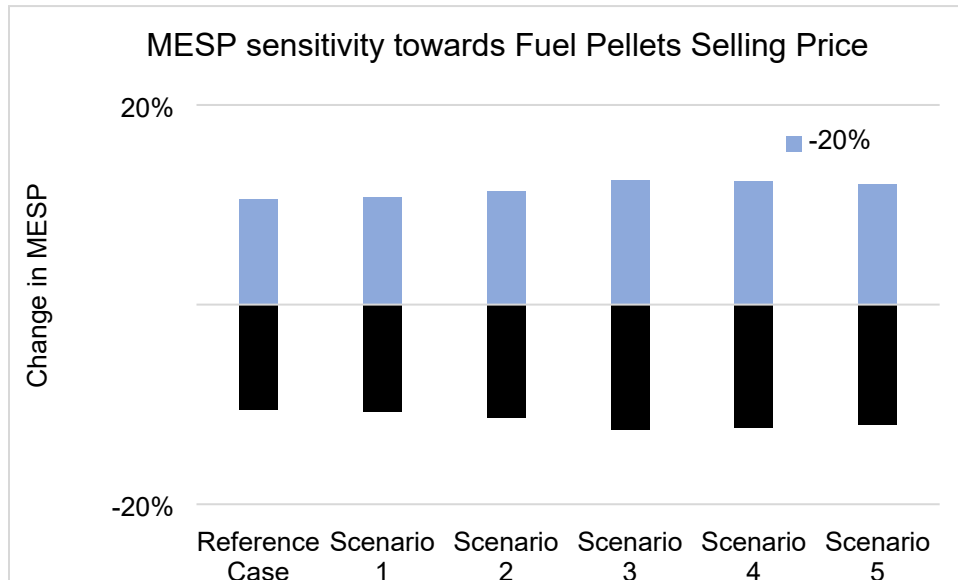

In a second sensitivity analysis, the fuel pellet contribution to avoided fossil fuel emissions (AFFE) in figure 4 are subject to + or - 20%. Since the later scenarios have greater negative carbon flux overall, any perturbation to the fuel pellet AFFE (consistent amongst all scenarios) will be effectively diluted out by the larger contributions enabled by CCS. Thus, later scenarios are less sensitive to the fuel pellet AFFE than those without CCS.

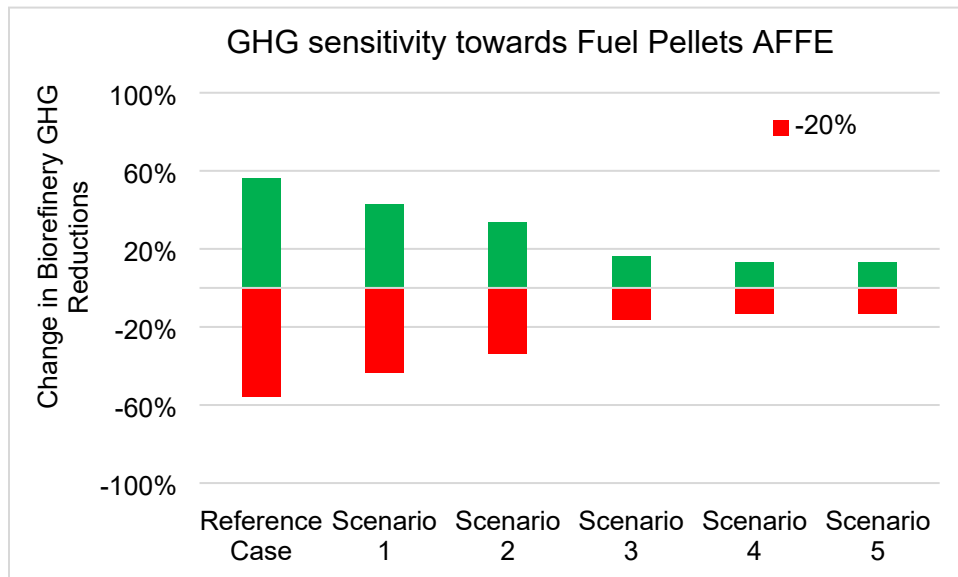

**Appendix A References**

1. Wooley R, Ruth M, Sheehan J, Ibsen K, Majdeski H, Galvez A. Lignocellulosic Biomass to Ethanol Process Design and Economics Utilizing Co-Current Dilute Acid Prehydrolysis and Enzymatic Hydrolysis Current and Futuristic Scenarios [Internet]. Golden, CO; 1999 Jul [cited 2022 Sep 25]. Available from: <https://www.osti.gov/biblio/12150>
2. Mcaloon A, Taylor F, Yee W, Ibsen K, Wooley R. Determining the Cost of Producing Ethanol from Corn Starch and Lignocellulosic Feedstocks [Internet]. Golden, CO; 2000 Oct [cited 2022 Sep 25]. Available from: <https://www.osti.gov/biblio/766198>
3. Aden A, Ruth M, Ibsen K, Jechura J, Neeves K, Sheehan J, et al. Lignocellulosic Biomass to Ethanol Process Design and Economics Utilizing Co-Current Dilute Acid Prehydrolysis and Enzymatic Hydrolysis for Corn Stover [Internet]. Golden, CO; 2002 Jun [cited 2022 Sep 25]. Available from: <https://www.osti.gov/biblio/1218326>
4. Kazi KF, Fortman J, Anex R, Kothandaraman G, Hsu D, Aden A, et al. Techno-Economic Analysis of Biochemical Scenarios for Production of Cellulosic Ethanol [Internet]. Golden, CO; 2007 [cited 2022 Sep 25]. Available from: <https://www.osti.gov/biblio/982937>
5. Humbird D, Davis R, Tao L, Kinchin C, Hsu D, Aden A, et al. Process Design and Economics for Biochemical Conversion of Lignocellulosic Biomass to Ethanol: Dilute-Acid Pretreatment and Enzymatic Hydrolysis of Corn Stover [Internet]. Golden, CO; 2011 May. Available from: <https://www.osti.gov/biblio/1013269>
6. Eggeman T, Elander RT. Process and economic analysis of pretreatment technologies. *Bioresour Technol.* 2005;96(18 SPEC. ISS.):2019–25.
7. Sendich E (Newton), Laser M, Kim S, Alizadeh H, Laureano-Perez L, Dale B, et al. Recent process improvements for the ammonia fiber expansion (AFEX) process and resulting reductions in minimum ethanol selling price. *Bioresour Technol.* 2008 Nov;99(17):8429–35.
8. Huang HJ, Ramaswamy S, Al-Dajani W, Tschirner U, Cairncross RA. Effect of biomass species and plant size on cellulosic ethanol: A comparative process and economic analysis. *Biomass Bioenergy.* 2009 Feb;33(2):234–46.
9. Klein-Marcuschamer D, Oleskowicz-Popiel P, Simmons BA, Blanch HW. Technoeconomic analysis of biofuels: A wiki-based platform for lignocellulosic biorefineries. *Biomass Bioenergy.* 2010 Dec;34(12):1914–21.
10. Bals B, Rogers C, Jin M, Balan V, Dale B. Evaluation of ammonia fibre expansion (AFEX) pretreatment for enzymatic hydrolysis of switchgrass harvested in different seasons and locations. *Biotechnol Biofuels.* 2010 Dec 4;3(1):1.
11. Meyer PA, Tews IJ, Magnuson JK, Karagiosis SA, Jones SB. Techno-economic analysis of corn stover fungal fermentation to ethanol. *Appl Energy.* 2013;111:657–68.
12. Tao L, Templeton DW, Humbird D, Aden A. Effect of corn stover compositional variability on minimum ethanol selling price (MESP). *Bioresour Technol.* 2013;140:426–30.
13. Chen X, Shekiro J, Pschorn T, Sabourin M, Tucker MP, Tao L. Techno-economic analysis of the deacetylation and disk refining process: Characterizing the effect of refining energy and enzyme

- usage on minimum sugar selling price and minimum ethanol selling price. *Biotechnol Biofuels*. 2015 Oct 29;8(1).
14. Yang M, Rosentrater KA. Techno-economic analysis (TEA) of low-moisture anhydrous ammonia (LMAA) pretreatment method for corn stover. *Ind Crops Prod*. 2015 Dec 5;76:55–61.
  15. Zhao L, Zhang X, Xu J, Ou X, Chang S, Wu M. Techno-economic analysis of bioethanol production from lignocellulosic biomass in china: Dilute-acid pretreatment and enzymatic hydrolysis of corn stover. *Energies (Basel)*. 2015;8(5):4096–117.
  16. Liu G, Bao J. Maximizing cellulosic ethanol potentials by minimizing wastewater generation and energy consumption: Competing with corn ethanol. *Bioresour Technol*. 2017;245:18–26.
  17. Lynd LR, Liang X, Bidy MJ, Allee A, Cai H, Foust T, et al. Cellulosic ethanol: status and innovation. Vol. 45, *Current Opinion in Biotechnology*. Elsevier Ltd; 2017. p. 202–11.
  18. Stoklosa RJ, del Pilar Orjuela A, da Costa Sousa L, Uppugundla N, Williams DL, Dale BE, et al. Techno-economic comparison of centralized versus decentralized biorefineries for two alkaline pretreatment processes. *Bioresour Technol*. 2017 Feb 1;226:9–17.
  19. Huang K, Won W, Barnett KJ, Brentzel ZJ, Alonso DM, Huber GW, et al. Improving economics of lignocellulosic biofuels: An integrated strategy for coproducing 1,5-pentanediol and ethanol. *Appl Energy*. 2018 Mar 1;213:585–94.
  20. Shen R, Tao L, Yang B. Techno-economic analysis of jet-fuel production from biorefinery waste lignin. *Biofuels, Bioproducts and Biorefining*. 2019 May 1;13(3):486–501.
  21. Yang M, Baral NR, Anastasopoulou A, Breunig HM, Scown CD. Cost and Life-Cycle Greenhouse Gas Implications of Integrating Biogas Upgrading and Carbon Capture Technologies in Cellulosic Biorefineries. *Environ Sci Technol*. 2020 Oct 20;54(20):12810–9.
  22. Das S, Anderson JE, De Kleine R, Wallington TJ, Jackson JE, Saffron CM. Technoeconomic analysis of corn stover conversion by decentralized pyrolysis and electrocatalysis. *Sustain Energy Fuels*. 2022 May 6;6(11):2823–34.
  23. Lan W, Chen G, Zhu X, Wang X, Liu C, Xu B. Biomass gasification-gas turbine combustion for power generation system model based on ASPEN PLUS. *Science of the Total Environment*. 2018 Jul 1;628–629:1278–86.
  24. Kang DW, Kim TS, Hur KB, Park JK. The effect of firing biogas on the performance and operating characteristics of simple and recuperative cycle gas turbine combined heat and power systems. *Appl Energy*. 2012;93:215–28.
  25. Liu Z, Karimi IA. Simulating combined cycle gas turbine power plants in Aspen HYSYS. *Energy Convers Manag*. 2018 Sep 1;171:1213–25.
  26. Niu M, Xie J, Liang S, Liu L, Wang L, Peng Y. Simulation of a new biomass integrated gasification combined cycle (BIGCC) power generation system using Aspen Plus: Performance analysis and energetic assessment. *Int J Hydrogen Energy*. 2021 Jun 23;46(43):22356–67.

27. Deng L, Hägg MB. Techno-economic evaluation of biogas upgrading process using CO<sub>2</sub> facilitated transport membrane. *International Journal of Greenhouse Gas Control*. 2010;4(4):638–46.
