# Supplementary material for: Carbon capture from corn stover ethanol production via mature consolidated bioprocessing enables large negative biorefinery GHG emissions and fossil fuel-competitive economics
Source: Royal Society of Chemistry journal article supplement (doi:10.1039/d3se00353a), 2023-01-01
Supplement: d3se00353a2.xlsx [file d3se00353a2.xlsx]

## Sheet: CAPEX
Appendix B. Capital Equipment Purchase Cost and Investment
2019 CEPI	607.5
Scale factor	1	1 = 2000 Mg/day
Ethanol produced	60.0335	MGY
Feedstock moisture content	0.2
	Number	Base	New		Scaling	Size	Scaling	Base	Scaled	Installation	Installed Cost	Base Cost	Project	CPI	Installed Cost	Cost
BIOLOGICAL CONVERSION	Required	Scale	Scale	Units	Stream	Ratio	Exponent	Purchase Cost	Purchase Cost	Factor	Base Year	Year	Year	Base Year	Project Year	Source
Ethanol Fermenter	21	1000000	1000000	gallon	BROTH	1	1	17724000	17724000	1.5	26586000	2009	2019	521.9	3.09465e+07	NREL 2011
Fermenter Agitators	21	1000000	1000000	gallon	BROTH	1	1	1102500	1102500	1.5	1653750	2009	2019	521.9	1.92499e+06	NREL 2011
Fermentation Coolers	21	1000000	1000000	gallon	BROTH	1	1	1825488	1825488	2.2	4.01607e+06	2009	2019	521.9	4.67477e+06	NREL 2011
Fermenter Transfer Pump	21	5	21	# of pumps	BROTH	4.2	1	47200	198240	2.3	455952	2009	2019	521.9	530735
Beer Storage Tank	1	425878	466658	kg/hr	BEER	1.09576	0.7	636000	678042	1.8	1.22048e+06	2009	2019	521.9	1.42065e+06	NREL 2011
Beer Storage Transfer Pump	1	488719	466658	kg/hr	BEER	0.95486	0.8	26800	25827.7	2.3	59403.8	2009	2019	521.9	69147
Cotreatment Wet Disc Mill	1	105820	104166	kg/hr	FEED	0.984369	0.6	4700000	4.65578e+06	1	4.65578e+06	2008	2019	575.4	4.91551e+06	Ramirez et al., 2008
														Fermentation	4.44823e+07
	Number	Base	New		Scaling	Size	Scaling	Base	Scaled	Installation	Installed Cost	Base Cost	Project	CPI	Installed Cost	Cost
PASTEURIZATION	Required	Scale	Scale	Units	Stream	Ratio	Exponent	Purchase Cost	Purchase Cost	Factor	Base Year	Year	Year	Base Year	Project Year	Source
Sterilization	2	75000	70561.9	gallon	CHARGE	0.940825	1	181900	171136	1.8	308045	2014	2019	576.1	649670	Matche.com
Pasteurization Pump	1	488719	393066	kg/hr	STR103	0.804279	0.8	26800	22514.4	2.3	51783.1	2009	2019	575.4	54671.9	NREL 2011
Spiral Plate Heat Exchanger	1	110	110	sqm	HX B21	1	1	122500	122500	1.8	220500	2004	2019	444.237	301537	Ulrich and Vasudevan 2004
													pasteurization	Ref. Case	704341
													pasteurization	S12345	1.00588e+06
	Number	Base	New		Scaling	Size	Scaling	Base	Scaled	Installation	Installed Cost	Base Cost	Project	CPI	Installed Cost	Cost
PRODUCT RECOVERY Part 1	Required	Scale	Scale	Units	Stream	Ratio	Exponent	Purchase Cost	Purchase Cost	Factor	Base Year	Year	Year	Base Year	Project Year	Source
Distillation column + feed heat exchanger	1	30379	28752.8	kg/hr	DIST	0.946469	0.6	3407000	3.29637e+06	2.4	7.91129e+06	2009	2019	521.9	9.20886e+06	NREL 2011
Beer Column								included
Rectification Column								included
Beer Column Reboiler								included
Rectification Column Reboiler								included
Beer Column Condenser	deduction							included
Rectificaiton Column Condenser	substitution							487000	487000	2.8	1363600	2010	2019	550.8	1.50397e+06	NREL 2011
Beer Column Feed Interchanger								included
Beer Column Bottoms Recirculation Pump								included
Beer Column Reflux Pump	deduction							included
Rectification Column Bottoms Pump								included
Rectification Column Reflux Pump								included
Beer Column Stillage Pump								included
Beer Column Reflux Drum	deduction							included
Rectification Column Drum								included
Configurational Changes	Configurational	Number	Scaling		Base	Bare Module	Bare	Installation	Installed Cost	Base Cost	CPI	Project	Installed Cost
	Changes	Required	Varible	Units	Purchase Cost	Factor	Purchase Cost	Factor	Base Year	Year	Base Year	Year	Target Year (2019)
Beer Column Condenser	deduction	1	116	sqm	14000	5.9	82600	2.4	198240	2004	400	2019	301077	NREL 2011, Ulrich and Vasudevan 2004
Beer Column Reflux Drum	deduction	1	75	ft^3	5000	3.8	19000	2.4	45600	2004	400	2019	69255	NREL 2011, Ulrich and Vasudevan 2004
Beer Colum Reflux Pump	deduction	1	2	hp	4500	4.9	22050	2.4	52920	2004	400	2019	80372.2	NREL 2011, Ulrich and Vasudevan 2004
Rectificaiton Column Condenser	substitution	1	861	sqm	65000	5.9	383500	2.2	843700	2004	400	2019	1.28137e+06	NREL 2011, Ulrich and Vasudevan 2004
Steam Compressor (w/o drive)	added	1	407	kW	30000	3.5	105000	1.6	168000	2004	400	2019	255150	NREL 2011, Ulrich and Vasudevan 2005
Steam Compressor Drive	added	1	407	kW	4000	1.5	6000	1.6	9600	2004	400	2019	14580	NREL 2011, Ulrich and Vasudevan 2006
														EtOH 1	8.80529e+06
	Number	Base	New		Scaling	Size	Scaling	Base	Scaled	Installation	Installed Cost	Base Cost	Project	CPI	Installed Cost	Cost
PRODUCT RECOVERY Part 2	Required	Scale	Scale	Units	Stream	Ratio	Exponent	Purchase Cost	Purchase Cost	Factor	Base Year	Year	Year	Base Year	Project Year	Source
Molecular Sieve Package (9 pieces)	1	22687	21419.1	kg/hr	ETOH	0.944114	0.6	2601000	2.51278e+06	2.4	6.03068e+06	2009	2019	521.9	7.01981e+06	NREL 2011
Beer Transfer Pump 1 (2 atm)	1	488719	466658	kg/hr	BEER	0.95486	0.6	26800	26067.4	2.3	59955.1	2009	2019	521.9	69788.7	NREL 2011
Beer Transfer Pump 2 (6 atm)	1	488719	460674	kg/hr	BEER2	0.942615	0.6	26800	25866.4	2.3	59492.6	2009	2019	521.9	69250.4	NREL 2011
														EtOH 2	7.0896e+06
	Number		New		Scaling	Size	Scaling	Base	Scaled	Installation	Installed Cost	Base Cost	Project	CPI	Installed Cost	Cost
MISC. EQUIPMENT	Required	Base Scale	Scale	Units	Stream	Ratio	Exponent	Purchase Cost	Purchase Cost	Factor	Base Year	Year	Year	Base Year	Project Year	Source
Vent Scrubber	1	22608	23647.5	kg/hr	OFFGAS	1.04598	0.6	215000	220878	2.4	530107	2009	2014	521.9	617053	NREL 2011
Scrubber Bottoms Pump	1	24527	54403.9	kg/hr	SCRBOT	2.21812	0.8	6300	11916	2.3	27406.7	2009	2014	521.9	31901.8	NREL 2011
Pressure Filter	1	31815	43112.9	kg/hr	SOLIDS (total)	1.35511	0.8	3294700	4.20142e+06	1.7	7.14242e+06	2009	2014	521.9	8.31389e+06	NREL 2011
Pressure Filter Drying Compressor	1	12233	12132.2	kg/hr	AIR2	0.991757	0.6	405000	402994	1.6	644790	2009	2014	521.9	750546	NREL 2011
Pressure Filter Pressing Compressor	1	813.6	826.811	kg/hr	AIR3	1.01624	0.6	75200	75930.3	1.6	121488	2009	2014	521.9	141415	NREL 2011
Drying Air Compressor Receiver	1	31815	43112.9	kg/hr	SOLIDS (total)	1.35511	0.7	17000	21029.6	3.1	65191.9	2010	2014	550.8	71902.8	NREL 2011
Pressing Air Compressor Receiver	1	31815	43112.9	kg/hr	SOLIDS (total)	1.35511	0.7	8000	9896.3	3.1	30678.5	2010	2014	550.8	33836.6	NREL 2011
Lignin Wet Cake Conveyor	1	31815	43112.9	kg/hr	SOLIDS (total)	1.35511	0.8	70000	89264.5	1.7	151750	2009	2014	521.9	176639	NREL 2011
Lignin Wet Cake Screw	1	31815	43112.9	kg/hr	SOLIDS (total)	1.35511	0.8	20000	25504.1	1.7	43357	2009	2014	521.9	50468.3	NREL 2011
Filtrate Tank Agitator	1	31815	43112.9	kg/hr	SOLIDS (total)	1.35511	0.5	26000	30266.4	1.5	45399.6	2009	2014	521.9	52845.9	NREL 2011
Filtrate Tank	1	31815	43112.9	kg/hr	SOLIDS (total)	1.35511	0.7	103000	127415	2	254830	2010	2014	550.8	281062	NREL 2011
Filtrate Tank Discharge Pump	1	31815	43112.9	kg/hr	SOLIDS (total)	1.35511	0.8	13040	16628.7	2.3	38246	2010	2014	550.8	42183.1	NREL 2011
Filtrate Discharge Pump	1	31815	43112.9	kg/hr	SOLIDS (total)	1.35511	0.8	13040	16628.7	2.3	38246	2010	2014	550.8	42183.1	NREL 2011
Feed Pump	1	31815	43112.9	kg/hr	SOLIDS (total)	1.35511	0.8	18173	23174.3	2.3	53301	2010	2014	550.8	58787.8	NREL 2011
Feed Tank	1	31815	43112.9	kg/hr	SOLIDS (total)	1.35511	0.7	174800	216234	2	432468	2010	2014	550.8	476987	NREL 2011
Manifold Flush Pump	1	31815	43112.9	kg/hr	SOLIDS (total)	1.35511	0.8	17057	21751.2	2.3	50027.8	2010	2014	550.8	55177.7	NREL 2011
Cloth Wash Pump	1	31815	43112.9	kg/hr	SOLIDS (total)	1.35511	0.8	29154	37177.4	2.3	85508	2010	2014	550.8	94310.2	NREL 2011
Recycled Water Tank	1	31815	43112.9	kg/hr	SOLIDS (total)	1.35511	0.7	1520	1880.3	3	5640.89	2010	2014	550.8	6221.57	NREL 2011
												Misc.	Scrubber	Air-Filter Pressing	1.12974e+07
	Number	Base	New		Scaling	Number	Scaling	Base	Scaled	Installation	Installed Cost	Base Cost	Project	CPI	Installed Cost	Cost
PELLET PRODUCTION	Required	Scale	Scale	Units	Stream	Required	Exponent	Purchase Cost	Purchase Cost	Factor	Base Year	Year	Year	Base Year	Project Year	Source
Dryer	5	6000	27155.5	kg/hr	SOLIDS(substream)	5	1	2150000	2150000	3	6450000	2008	2014	575.4	6.80983e+06	Sultana et al., 2010
Feeder	5	6000	27155.5	kg/hr	SOLIDS(substream)	5	1	223500	223500	3	670500	2008	2014	575.4	707905	Sultana et al., 2010
Pellet Mill	5	6000	27155.5	kg/hr	SOLIDS(substream)	5	1	1750000	1750000	3	5250000	2008	2014	575.4	5.54288e+06	Sultana et al., 2010
Pellet Cooler	5	6000	27155.5	kg/hr	SOLIDS(substream)	5	1	850000	850000	3	2550000	2008	2014	575.4	2.69226e+06	Sultana et al., 2010
Screener/Shaker	5	6000	27155.5	kg/hr	SOLIDS(substream)	5	1	91500	91500	3	274500	2008	2014	575.4	289814	Sultana et al., 2010
Bagging System	5	6000	27155.5	kg/hr	SOLIDS(substream)	5	1	2250000	2250000	3	6750000	2008	2014	575.4	7.12656e+06	Sultana et al., 2010
Conveyor, tanks, etc.	5	6000	27155.5	kg/hr	SOLIDS(substream)	5	1	565000	565000	3	1695000	2008	2014	575.4	1.78956e+06	Sultana et al., 2010
														Fuel Pellets	2.49588e+07
	Number	Base	New		Scaling	Size	Scaling	Base	Scaled	Installation	Installed Cost	Base Cost	Project	CPI	Installed Cost	Cost
ANAEROBIC DIGESTION	Required	Scale	Scale	Units	Stream	ratio	Exponent	Purchase Cost	Purchase Cost	Factor	Base Year	Year	Year	Base Year	Project Year	Source
Biodigester (COD: kg/m3/d)															2.76183e+07	Mes et al. 2003 & Lynd et al. 2017
Biogas Emergency Flare	4	393100	359424	kg/hr	ADFEED	0.914332	0.6	32955	31230.8	1	31230.8	2010	2014	550.8	34445.8	NREL 2011
Aerobic Sludge Screw	1	393100	359424	kg/hr	ADFEED	0.914332	0.6	25000	23692	1	23692	2010	2014	550.8	26130.9	NREL 2011
Anaerobic Reactor Feed Pump	4	393100	359424	kg/hr	ADFEED	0.914332	0.6	231488	219377	1	219377	2010	2014	550.8	241960	NREL 2011
Waste Anaerobic Sludge Pump	6	393100	359424	kg/hr	ADFEED	0.914332	0.6	93300	88418.7	1	88418.7	2010	2014	550.8	97520.6	NREL 2011
Return Activated Sludge Pump	6	393100	359424	kg/hr	ADFEED	0.914332	0.6	177300	168024	1	168024	2010	2014	550.8	185321	NREL 2011
Centrifuge Feed Pump	2	393100	359424	kg/hr	ADFEED	0.914332	0.6	61200	57998.1	1	57998.1	2010	2014	550.8	63968.5	NREL 2011
Centrate Pump	2	393100	359424	kg/hr	ADFEED	0.914332	0.6	70800	67095.9	1	67095.9	2010	2014	550.8	74002.8	NREL 2011
Centrifuge	3	393100	359424	L/hr	ADFEED	0.914332	0.6	6493500	6.15377e+06	1	6.15377e+06	2010	2014	550.8	6.78725e+06	NREL 2011
														Anerobic Digester	3.51289e+07
	Number	Base	New		Scaling	Size	Scaling	Base	Bare Module	Total Module	Total Module Cost	Base Cost	Project	CPI	Installed Cost	Cost
	Required	Scale	Scale	Units	Stream	Ratio	Exponent	Purchase Cost	Purchase Cost	Factor	Base Year	Year	Year	Base Year	Project Year	Source
BIOGAS TREATMENT
Desulphirizer Media-G2®	1	56.4	13714	Nm^3/hr	BIOGAS	243.156	1	13000	3161028	1.5	4741542	2008	2019	575.4	5.00606e+06	Abatzoglou and Boivin 2008
													Desulphirizer Media-G2®		5.00606e+06
	Number	Base	New		Scaling	Size	Scaling	Base	Bare Module	Total Module	Total Module Cost	Base Cost	Project	CPI	Installed Cost	Cost
BIOGAS UPGRADING	Required	Scale	Scale	Units	Stream	Ratio	Exponent	Purchase Cost	Purchase Cost	Factor	Base Year	Year	Year	Base Year	Project Year	Source
Biogas Membrane Separation	1
Axial Compressors		1000	13714	Nm^3/hr	BIOGAS	13.714	0.6	1011164	4.86542e+06	1	4.86542e+06	1996	2019	382	7.73754e+06	Deng and Haag 2010
Membranes		1000	13714	Nm^3/hr	BIOGAS	13.714	1	466920	6.40334e+06	1	6.40334e+06	1996	2019	382	1.01833e+07	Deng and Haag 2010
														Biogas Membrane	1.79209e+07
		Scaling		Purchase	Cumulative Factor	Bare Module	Installation	Base	Base Cost	Project	CPI	Installed Cost
BOILER		Varible	Units	Cost	Factor	Purchase Cost	Factor	Purchase Cost	Year	Year	Base Year	Project Year		Boiler	Subtotal	Source
Boiler - Ref. Case	1	76155.2	kJ/s	810000	2.052	1662120	1.8	2991816	2004	2019	400	4.54382e+06		Ref. Case	4.54382e+06	Ulrich and Vasudevan 2004
Boiler - Scenario 1	1	47520.7	kJ/s	600000	2.052	1231200	1.8	2216160	2004	2019	400	3365793		Scenario 1	3365793	Ulrich and Vasudevan 2004
Boiler - Scenario 2	1	35773.1	kJ/s	450000	2.052	923400	1.8	1662120	2004	2019	400	2.52434e+06		Scenario 2	2.52434e+06	Ulrich and Vasudevan 2004
Boiler - Scenario 3	1	35773.1	kJ/s	450000	2.052	923400	1.8	1662120	2004	2019	400	2.52434e+06		Scenario 3	2.52434e+06	Ulrich and Vasudevan 2004
Boiler - Scenario 4	1	44426.9	kJ/s	550000	2.052	1128600	1.8	2031480	2004	2019	400	3.08531e+06		Scenario 4	3.08531e+06	Ulrich and Vasudevan 2004
Boiler - Scenario 5	1	36305.4	kJ/s	460000	2.052	943920	1.8	1699056	2004	2019	400	2.58044e+06		Scenario 5	2.58044e+06	Ulrich and Vasudevan 2004
														Gas Boiler
		Scaling		Purchase	Cumulative Factor	Bare Module	Installation	Base	Base Cost	Project	CPI	Installed Cost
GAS TURBINE		Varible	Units	Cost	Factor	Purchase Cost	Factor	Purchase Cost	Year	Year	Base Year	Project Year
Biogas Turbine - Scenario 2 & 3	1	8830.46	kW	700000	3.5	2450000	1.8	4410000	2004	2019	400	6.69769e+06				Ulrich and Vasudevan 2004
RNG Turbine - Scenario 5	1	8921.73	kW	725000	3.5	2537500	1.8	4567500	2004	2019	400	6.93689e+06				Ulrich and Vasudevan 2004
Heat Recovery - Gas Turbine	1	110	sqm	25000	4.9	122500	1.8	220500	2004	2019	400	334884				Ulrich and Vasudevan 2004
														Biogas Turbine	7.03257e+06
														RNG Turbine	7271775
	Number	Base	New		Scaling	Size	Scaling	Base	Scaled	Installation	Installed Cost	Base Cost	Project	CPI	Installed Cost	Cost
COOLING, WATER, AND AIR	Required	Scale	Scale	Units	Stream	Ratio	Exponent	Purchase Cost	Purchase Cost	Factor	Base Year	Year	Year	Base Year	Project Year	Source
Cooling Tower System	1	10037820	3.78539e+06	kg/hr	COOL	0.377113	0.6	1375000	765924	1.5	1.14889e+06	2010	2014	550.8	1.26715e+06	NREL 2011
Plant Air Compressor	1	83333	104166	kg/hr	FEED	1.25	0.6	28000	32011.3	1.6	51218.1	2010	2014	550.8	56490.5	NREL 2011
CIP System	1	83333	104166	kg/hr	FEED	1.25	0.6	421000	481313	1.8	866363	2009	2014	521.9	1.00846e+06	NREL 2011
Cooling Water Pump	3	10982556	4.1267e+06	kg/hr	COOL	0.37575	0.8	283671	129639	3.1	401879	2010	2014	550.8	443249	NREL 2011
Make-up Water Pump	1	155564	67163	kg/hr	MAKEUP	0.43174	0.8	6864	3505.54	3.1	10867.2	2010	2014	550.8	11985.9	NREL 2011
Process Water Circulating Pump	1	518924	428781	kg/hr	PWATER	0.82629	0.8	15292	13127.1	3.1	40694.2	2010	2014	550.8	44883.3	NREL 2011
Instrument Air Dryer	1	83333	104166	kg/hr	FEED	1.25	0.6	15000	17148.9	1.8	30868	2009	2014	521.9	35930.9	NREL 2011
Plant Air Receiver	1	83333	104166	kg/hr	FEED	1.25	0.6	16000	18292.2	3.1	56705.7	2009	2014	521.9	66006.4	NREL 2011
Process Water Tank No. 1	1	451555	428781	kg/hr	PWATER	0.949566	0.7	250000	241106	1.7	409880	2009	2014	521.9	477107	NREL 2011
														Cooling, Water, Air	3.41127e+06
	Number	Base	New		Scaling	Size	Scaling	Base	Scaled	Installation	Installed Cost	Base Cost	Project	CPI	Installed Cost	Cost
STORAGE	Required	Scale	Scale	Units	Stream	Ratio	Exponent	Purchase Cost	Purchase Cost	Factor	Base Year	Year	Year	Base Year	Project Year	Source
CSL Storage Tank Agitator	1	1393	2753.02	kg/hr	CSL	1.97632	0.5	21200	29803.3	1.5	44705	2009	2014	525.4	51690.7	NREL 2011
Urea Make-up Tank Agitator	1	163	275.3	kg/hr	UREA	1.68896	0.5	9800	12736.1	1.5	19104.1	2009	2014	525.4	22089.3	NREL 2011
Urea Bulk Bag Unloader	1	163	275.3	kg/hr	UREA	1.68896	0.6	30000	41085.9	1.7	69846	2009	2014	525.4	80760.2	NREL 2011
Ethanol Product Pump	2	22681	21445	kg/hr	ETHANOL	0.945506	0.8	9200	8796.69	3.1	27269.7	2009	2014	525.4	31531	NREL 2011
Firewater Pump	1	83333	104166	kg/hr	FEED	1.25	0.8	15000	17931.6	3.1	55587.9	2009	2014	525.4	64274.2	NREL 2011
CSL Pump	1	1393	2753.02	kg/hr	CSL	1.97632	0.8	3000	5173.78	3.1	16038.7	2009	2014	525.4	18545	NREL 2011
Urea Pump	1	163	275.3	kg/hr	UREA	1.68896	0.8	3000	4562.64	3.1	14144.2	2009	2014	525.4	16354.4	NREL 2011
Ethanol Product Storage Tank	2	22681	21445	kg/hr	ETHANOL	0.945506	0.7	1340000	1.28846e+06	1.7	2.19038e+06	2009	2014	525.4	2.53265e+06	NREL 2011
Firewater Storage Tank	1	83333	104166	kg/hr	FEED	1.25	0.7	803000	938754	1.7	1.59588e+06	2009	2014	525.4	1.84526e+06	NREL 2011
CSL Storage Tank	1	1393	2753.02	kg/hr	CSL	1.97632	0.7	70000	112771	2.6	293206	2009	2014	525.4	339022	NREL 2011
Urea Make-up Tank and Bulk Bag Holder	1	1615	275.3	kg/hr	UREA	0.170464	0.7	102000	29562.7	1.8	53212.8	2009	2014	525.4	61528	NREL 2011
														Storage	5.0637e+06
	Number	Base	New		Scaling	Size	Scaling	Base	Scaled	Installation	Installed Cost	Base Cost	Project	CPI	Installed Cost
CO2 COMPRESSOR	Required	Scale	Scale	Units	Stream	Ratio	Exponent	Purchase Cost	Purchase Cost	Factor	Base Year	Year	Year	Base Year	Project Year
CO2 compressor S3	1	35991	47681.7	lb/hr	EXGAS	1.32482	0.6	5444000	6.44485e+06	1	6.44485e+06	2011	2019	585.7	6.68473e+06	DOE/NETL-2013/1602
CO2+ compressor S45	1	35991	73776.9	lb/hr	EXGAS+PERM	2.04987	0.6	5444000	8.37441e+06	1	8.37441e+06	2011	2019	585.7	8.6861e+06	DOE/NETL-2013/1602
														CO2 Compression	2.00137e+06
		Scaling		Purchase	Cumulative Factor	Bare Module	Installation	Installed
Ulrich Estimates, do not seem accurate		Varible	Units	Cost	Factor	Purchase Cost	Factor	Cost	CEPI (2004)	Installed Cost (2019)	subtotals
CO2 compressor S123	1	1814.4	kW	1200000	2.5	3000000	1.6	4800000	400	7290000
CO2 comp. motor S123	1	1814.4	kW	100000	1.5	150000	1.6	240000	400	364500	7654500
CO2+ compressor S45	1	2761.5	kW	1800000	2.5	4500000	1.6	7200000	400	10935000
CO2+ comp. motor S45	1	2761.5	kW	170000	1.5	255000	1.6	408000	400	619650	11554650
Ref. Case Only:
	Number		New		Scaling	Size	Scaling	Base	Scaled	Installation	Installed Cost	Base Cost	Project	CPI	Installed Cost	Cost
PRODUCT RECOVERY	Required	Base Scale	Scale	Units	Stream	Ratio	Exponent	Purchase Cost	Purchase Cost	Factor	Base Year	Year	Year	Base Year	Project Year	Source
Distillation column + feed heat exchanger	1	30379	28820.7	kg/hr	114	0.948704	0.6	3407000	3.30104e+06	2.4	7.92249e+06	2009	2019	521.9	9.22191e+06	NREL 2011
Molecular Sieve Package (9 pieces)	1	22687	21425.3	kg/hr	120	0.944387	0.6	2601000	2.51322e+06	2.4	6.03172e+06	2009	2019	521.9	7.02102e+06	NREL 2011
Rectificaiton Column Condenser								487000	487000	2.8	1363600	2009	2019	521.9	1.58725e+06	NREL 2011
		Base		Base	New	Scaled	Installation	Installed	CPI (2009)	Installed Cost
		Scale	Units	Purchase Cost	Scale	Purchase Cost	Factor	Cost	Base Year	Project Year (2019)
Beer Transfer Pump	1	488719	kg/hr	26800	460769	25267.3	2.3	58114.8	521.9	67646.6			Ref. Case	Storage	67646.6	NREL 2011
													Ref. Case	EtOH	1.78978e+07	NREL 2011

## Sheet: TCI
Appendix B. Total Capital Invesment (TCI)
Land Requirement
132	acres
14000	/acre
1848000
1. DIRECT COSTS
Process Area			Reference Case (Lynd et al. 2017)	Scenario 1	Scenario 2	Scenario 3	Scenario 4	Scenario 5
Feedstock Handling	*Feedstock Handling not included in this calculation		n/a	n/a	n/a	n/a	n/a	n/a
Biological Conversion			4.51867e+07	4.54882e+07	4.54882e+07	4.54882e+07	4.54882e+07	4.54882e+07
Product Recovery			2.91952e+07	2.71923e+07	2.71923e+07	2.71923e+07	2.71923e+07	2.71923e+07
Biogas Membrane			0	0	0		1.79209e+07	1.79209e+07
Pellet Production			2.49588e+07	2.49588e+07	2.49588e+07	2.49588e+07	2.49588e+07	2.49588e+07
Boiler			4.54382e+06	3365793	2.52434e+06	2.52434e+06	3.08531e+06	2.58044e+06
Turbine					7.03257e+06	7.03257e+06		7271775
Anaerobic Digestion			4.0135e+07	4.0135e+07	4.0135e+07	4.0135e+07	4.0135e+07	4.0135e+07
Cooling, Water, and Air			3.41127e+06	3.41127e+06	3.41127e+06	3.41127e+06	3.41127e+06	3.41127e+06
Storage			5.0637e+06	5.0637e+06	5.0637e+06	5.0637e+06	5.0637e+06	5.0637e+06
CO2 Compression						6.68473e+06	8.6861e+06	8.6861e+06
TOTAL INSTALLED CAPITAL*			1.52494e+08	1.49615e+08	1.55806e+08	1.62491e+08	1.75942e+08	1.82708e+08
Inside Battery Limits (ISBL)			9.93407e+07	9.76393e+07	9.76393e+07	1.04324e+08	1.06325e+08	1.06325e+08
Additional Direct Costs
Warehouse	0.04	of ISBL	3.97363e+06	3.90557e+06	3.90557e+06	4.17296e+06	4.25302e+06	4.25302e+06
Site Development	0.09	of ISBL	8.94067e+06	8.78754e+06	8.78754e+06	9.38917e+06	9.56929e+06	9.56929e+06
Additional Piping	0.045	of ISBL	4.47033e+06	4.39377e+06	4.39377e+06	4.69458e+06	4.78464e+06	4.78464e+06
			1.73846e+07	1.70869e+07	1.70869e+07	1.82567e+07	1.8607e+07	1.8607e+07
TOTAL DIRECT COSTS (TDC)			1.69879e+08	1.66702e+08	1.72893e+08	1.80748e+08	1.94548e+08	2.01315e+08
2. INDIRECT COSTS
Prorateable Expenses	0.1	of TDC	1.69879e+07	1.66702e+07	1.72893e+07	1.80748e+07	1.94548e+07	2.01315e+07
Field Expenses	0.1	of TDC	1.69879e+07	1.66702e+07	1.72893e+07	1.80748e+07	1.94548e+07	2.01315e+07
Home Office & Construction Fee	0.2	of TDC	3.39758e+07	3.33404e+07	3.45786e+07	3.61495e+07	3.89097e+07	4.02631e+07
Project Contingency	0.1	of TDC	1.69879e+07	1.66702e+07	1.72893e+07	1.80748e+07	1.94548e+07	2.01315e+07
Other Costs (Start-Up, Permits, etc.)	0.1	of TDC	1.69879e+07	1.66702e+07	1.72893e+07	1.80748e+07	1.94548e+07	2.01315e+07
TOTAL INDIRECT COSTS			1.01927e+08	1.00021e+08	1.03736e+08	1.08449e+08	1.16729e+08	1.20789e+08
3. FIXED CAPITAL INVESTMENT			2.71807e+08	2.66723e+08	2.76629e+08	2.89196e+08	3.11278e+08	3.22105e+08
Additional Capital Investment
Land			1848000	1848000	1848000	1848000	1848000	1848000
Working Capital	0.05	of FCI	1.35903e+07	1.33362e+07	1.38314e+07	1.44598e+07	1.55639e+07	1.61052e+07
4. TOTAL CAPITAL INVESTMENT			2.87245e+08	2.81907e+08	2.92308e+08	3.05504e+08	3.28689e+08	3.40058e+08
Annual Ethanol			60.0267	60.0184	60.0184	60.0184	60.0184	60.0184	MGY
			4.78528	4.69702	4.87032	5.09018	5.47648	5.6659	$/annual gallon

## Sheet: Electricty Carbon Intensity Est
Appendix B. Electricity Carbon Intensity
Year	State	Producer Type	Energy Source	CO2 (Metric Tons)	SO2 (Metric Tons)	NOx (Metric Tons)
2019	US-TOTAL	Total Electric Power Industry	All Sources	1724396105	1266690	1341546
YEAR	STATE	TYPE OF PRODUCER	ENERGY SOURCE	GENERATION (Megawatthours)
2019	US-Total	Total Electric Power Industry	Total	4127855213
carbon intensity	0.417746	metric tons CO2 / MWh
	0.417746	kg CO2 / kWh

## Sheet: D3 RIN - 2019
Appendix B. 2019 D3 RIN Value
Data from https://www.epa.gov/
fuels-registration-reporting-and-compliance-help/rin-trades-and-price-information
Active filters D3-only, 2019-only
Average	1.35177	per gallon ethanol
	17.7	per MMBtu
RNG LHV	50	MJ/kg
	0.0474	MMBtu/kg
RNG equivalence	0.83898	$/kg
	838.98	$/ton
Transfer Date by Week	Transfer Year	RIN Year	Fuel (D Code)	QAP Service Type	RIN Price
2018-12-31	2019	2018	D3	Q-RIN	2.3
2019-01-07	2019	2017	D3	Q-RIN	1.8
2019-01-07	2019	2018	D3	Q-RIN	2.12
2019-01-07	2019	2018	D3	Unverified	1.9
2019-01-14	2019	2017	D3	Q-RIN	1.76
2019-01-14	2019	2018	D3	Q-RIN	2
2019-01-14	2019	2018	D3	Unverified	2.2
2019-01-21	2019	2018	D3	Q-RIN	2.06
2019-01-28	2019	2018	D3	Q-RIN	1.97
2019-02-04	2019	2018	D3	Q-RIN	1.9
2019-02-04	2019	2018	D3	Unverified	1.84
2019-02-11	2019	2018	D3	Q-RIN	1.87
2019-02-11	2019	2018	D3	Unverified	1.77
2019-02-11	2019	2019	D3	Q-RIN	1.85
2019-02-18	2019	2018	D3	Q-RIN	1.97
2019-02-18	2019	2018	D3	Unverified	1.77
2019-02-18	2019	2019	D3	Q-RIN	1.61
2019-02-25	2019	2017	D3	Q-RIN	1.78
2019-02-25	2019	2017	D3	Unverified	1.47
2019-02-25	2019	2018	D3	Q-RIN	1.89
2019-02-25	2019	2019	D3	Q-RIN	1.82
2019-03-04	2019	2017	D3	Unverified	1.5
2019-03-04	2019	2018	D3	Q-RIN	1.8
2019-03-04	2019	2019	D3	Q-RIN	1.77
2019-03-11	2019	2017	D3	Q-RIN	1.6
2019-03-11	2019	2018	D3	Q-RIN	1.84
2019-03-11	2019	2019	D3	Q-RIN	1.82
2019-03-18	2019	2017	D3	Q-RIN	1.26
2019-03-18	2019	2018	D3	Q-RIN	1.85
2019-03-18	2019	2019	D3	Q-RIN	1.51
2019-03-25	2019	2017	D3	Unverified	1.78
2019-03-25	2019	2018	D3	Q-RIN	1.78
2019-03-25	2019	2018	D3	Unverified	1.84
2019-03-25	2019	2019	D3	Q-RIN	1.77
2019-04-01	2019	2018	D3	Q-RIN	1.65
2019-04-01	2019	2019	D3	Q-RIN	1.64
2019-04-08	2019	2019	D3	Q-RIN	1.6
2019-04-15	2019	2019	D3	Q-RIN	1.76
2019-04-22	2019	2018	D3	Q-RIN	1.67
2019-04-22	2019	2019	D3	Q-RIN	1.72
2019-04-29	2019	2019	D3	Q-RIN	1.71
2019-05-06	2019	2018	D3	Unverified	1.25
2019-05-06	2019	2019	D3	Q-RIN	1.54
2019-05-13	2019	2019	D3	Q-RIN	1.67
2019-05-20	2019	2019	D3	Q-RIN	1.57
2019-05-27	2019	2019	D3	Q-RIN	1.54
2019-05-27	2019	2019	D3	Unverified	1.1
2019-06-03	2019	2019	D3	Q-RIN	1.46
2019-06-10	2019	2018	D3	Q-RIN	1.38
2019-06-10	2019	2019	D3	Q-RIN	1.47
2019-06-17	2019	2019	D3	Q-RIN	1.38
2019-06-24	2019	2019	D3	Q-RIN	1.17
2019-06-24	2019	2019	D3	Unverified	0.7
2019-07-01	2019	2019	D3	Q-RIN	1.13
2019-07-08	2019	2019	D3	Q-RIN	0.99
2019-07-15	2019	2018	D3	Q-RIN	0.8
2019-07-15	2019	2019	D3	Q-RIN	1.36
2019-07-22	2019	2019	D3	Q-RIN	1.34
2019-07-29	2019	2019	D3	Q-RIN	1.27
2019-07-29	2019	2019	D3	Unverified	1.71
2019-08-05	2019	2018	D3	Q-RIN	0.52
2019-08-05	2019	2019	D3	Q-RIN	0.7
2019-08-12	2019	2018	D3	Q-RIN	0.48
2019-08-12	2019	2019	D3	Q-RIN	1.01
2019-08-19	2019	2019	D3	Q-RIN	1.16
2019-08-26	2019	2019	D3	Q-RIN	0.64
2019-09-02	2019	2019	D3	Q-RIN	0.68
2019-09-09	2019	2019	D3	Q-RIN	0.59
2019-09-16	2019	2018	D3	Q-RIN	0.46
2019-09-16	2019	2019	D3	Q-RIN	0.87
2019-09-23	2019	2019	D3	Q-RIN	0.95
2019-09-30	2019	2019	D3	Q-RIN	1.07
2019-10-07	2019	2018	D3	Q-RIN	0.58
2019-10-07	2019	2019	D3	Q-RIN	0.73
2019-10-14	2019	2018	D3	Q-RIN	0.69
2019-10-14	2019	2019	D3	Q-RIN	0.83
2019-10-21	2019	2018	D3	Q-RIN	0.67
2019-10-21	2019	2019	D3	Q-RIN	0.83
2019-10-28	2019	2019	D3	Q-RIN	0.96
2019-11-04	2019	2019	D3	Q-RIN	1.01
2019-11-04	2019	2019	D3	Unverified	0.73
2019-11-11	2019	2019	D3	Q-RIN	0.68
2019-11-18	2019	2019	D3	Q-RIN	0.94
2019-11-18	2019	2019	D3	Unverified	1.77
2019-11-25	2019	2019	D3	Q-RIN	1.04
2019-12-02	2019	2018	D3	Q-RIN	0.74
2019-12-02	2019	2019	D3	Q-RIN	0.78
2019-12-09	2019	2018	D3	Q-RIN	1.28
2019-12-09	2019	2019	D3	Q-RIN	0.77
2019-12-16	2019	2018	D3	Q-RIN	0.82
2019-12-16	2019	2019	D3	Q-RIN	0.96
2019-12-16	2019	2019	D3	Unverified	1.26
2019-12-23	2019	2019	D3	Q-RIN	0.98
2019-12-23	2019	2019	D3	Unverified	1.19
2019-12-30	2019	2018	D3	Q-RIN	1.01
2019-12-30	2019	2019	D3	Q-RIN	1.04

## Sheet: Gasoline Data
	Appendix B. Gasoline prices over the last decade.
https://www.eia.gov/dnav/pet/hist/LeafHandler.ashx?n=PET&s=EMA_EPM0_PWG_NUS_DPG&f=M
U.S. Total Gasoline Wholesale/Resale Price by Refiners (Dollars per Gallon)
Year	Jan	Feb	Mar	Apr	May	Jun	Jul	Aug	Sep	Oct	Nov	Dec
2010	2.097	2.033	2.197	2.265	2.152	2.113	2.113	2.095	2.088	2.198	2.243	2.383
2011	2.472	2.584	2.934	3.218	3.174	2.97	3.058	2.949	2.896	2.805	2.701	2.614
2012	2.747	2.936	3.203	3.189	3.016	2.757	2.806	3.087	3.163	2.941	2.713	2.59
2013	2.676	3.02	2.987	2.853	2.951	2.882	2.942	2.89	2.792	2.632	2.544	2.581
2014	2.604	2.699	2.855	2.981	2.951	3.001	2.855	2.759	2.669	2.333	2.111	1.634
2015	1.366	1.637	1.77	1.835	2.08	2.121	2.072	1.838	1.609	1.558	1.426	1.356
2016	1.187	1.046	1.335	1.476	1.613	1.643	1.49	1.508	1.514	1.568	1.427	1.585
2017	1.627	1.625	1.634	1.723	1.668	1.574	1.621	1.711	1.826	1.73	1.806	1.72
2018	1.849	1.823	1.889	2.054	2.205	2.135	2.148	2.118	2.136	2.09	1.732	1.514
2019	1.483	1.624	1.881	2.138	2.11	1.909	1.984	1.82	1.854	1.871	1.819	1.757
2020	1.743	1.669	1.127	0.645	1.049	1.311	1.38	1.389	1.354	1.312	1.287	1.394
2021	1.575	1.784	2.011	2.055	2.181	2.252	2.337	2.302	2.31	2.494	2.484	2.304
2022	2.423	2.639	3.232
	# months	147
	Average	2.14295	$/gal
	Standard Deviation	0.588703
		MJ/L	MJ/gal
	Ethanol LHV	21.1	79.8722
	Gasoline LHV	32	121.133
	liter-to-gal	0.264172

## Sheet: D3 RIN - 2014-2022
Appendix B. D3 RIN prices over the last decade.
